# Supplementary material for: Gallic Acid-Containing Gelatin-Based Nonwoven Mat with Synergistic Photodegradation and Photoindication Function for Reducing Nicotine
Source: MDPI journal article supplement (doi:10.3390/polym13234245), 2021-12-03
Supplement: s1 [file s1]

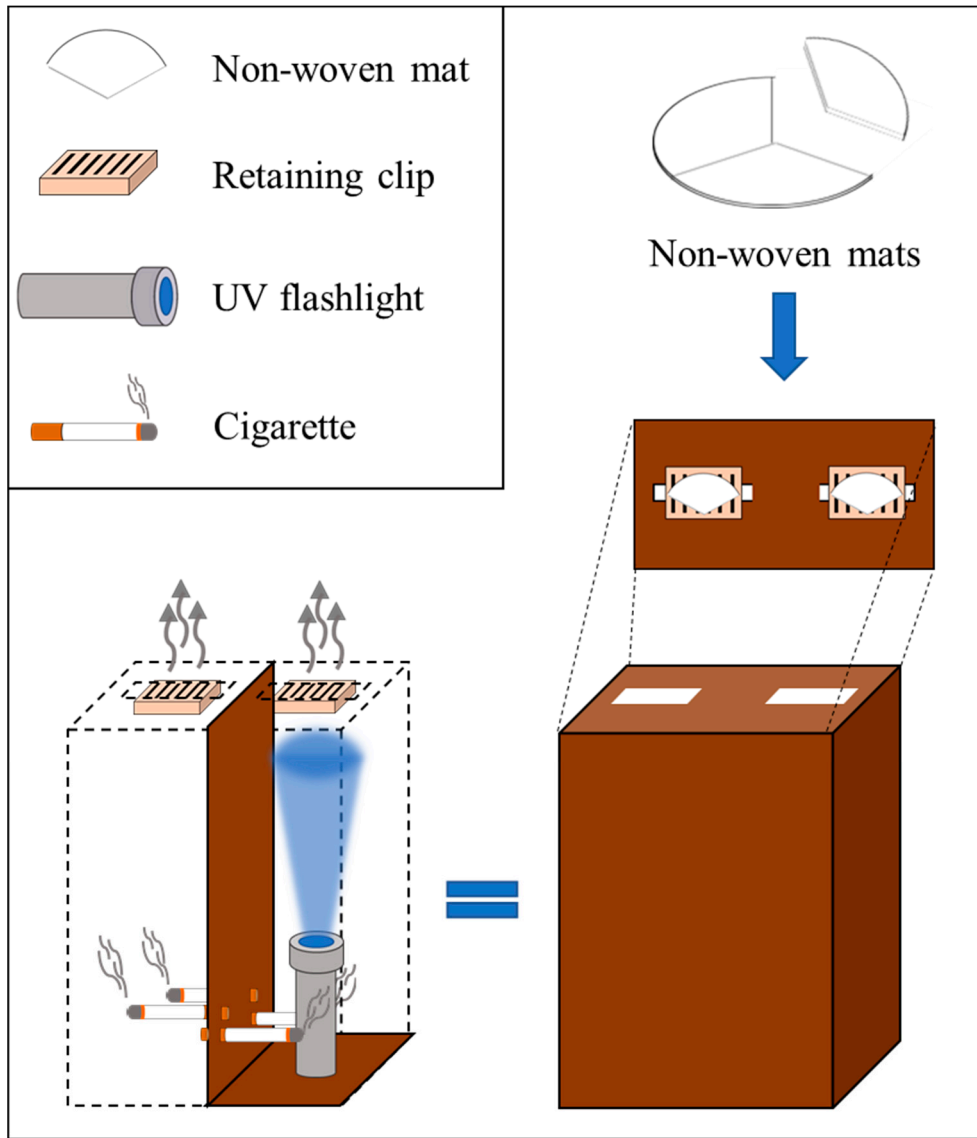

**Schematic Diagram S1.** Experimental steps of the nonwoven mats fumigated with sidestream smoke.

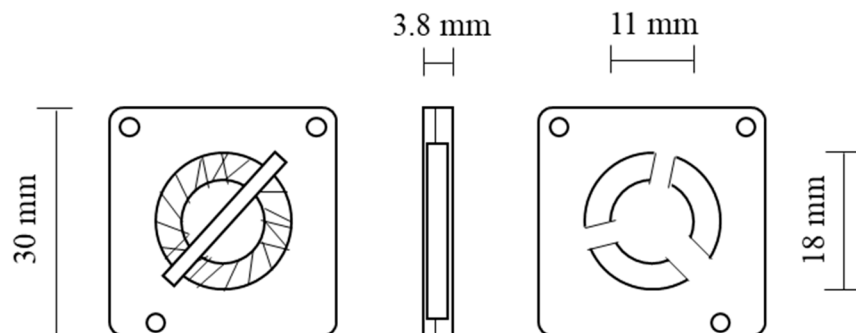

**Schematic Diagram S2.** Powerful yet compact blower attached to portable equipment.

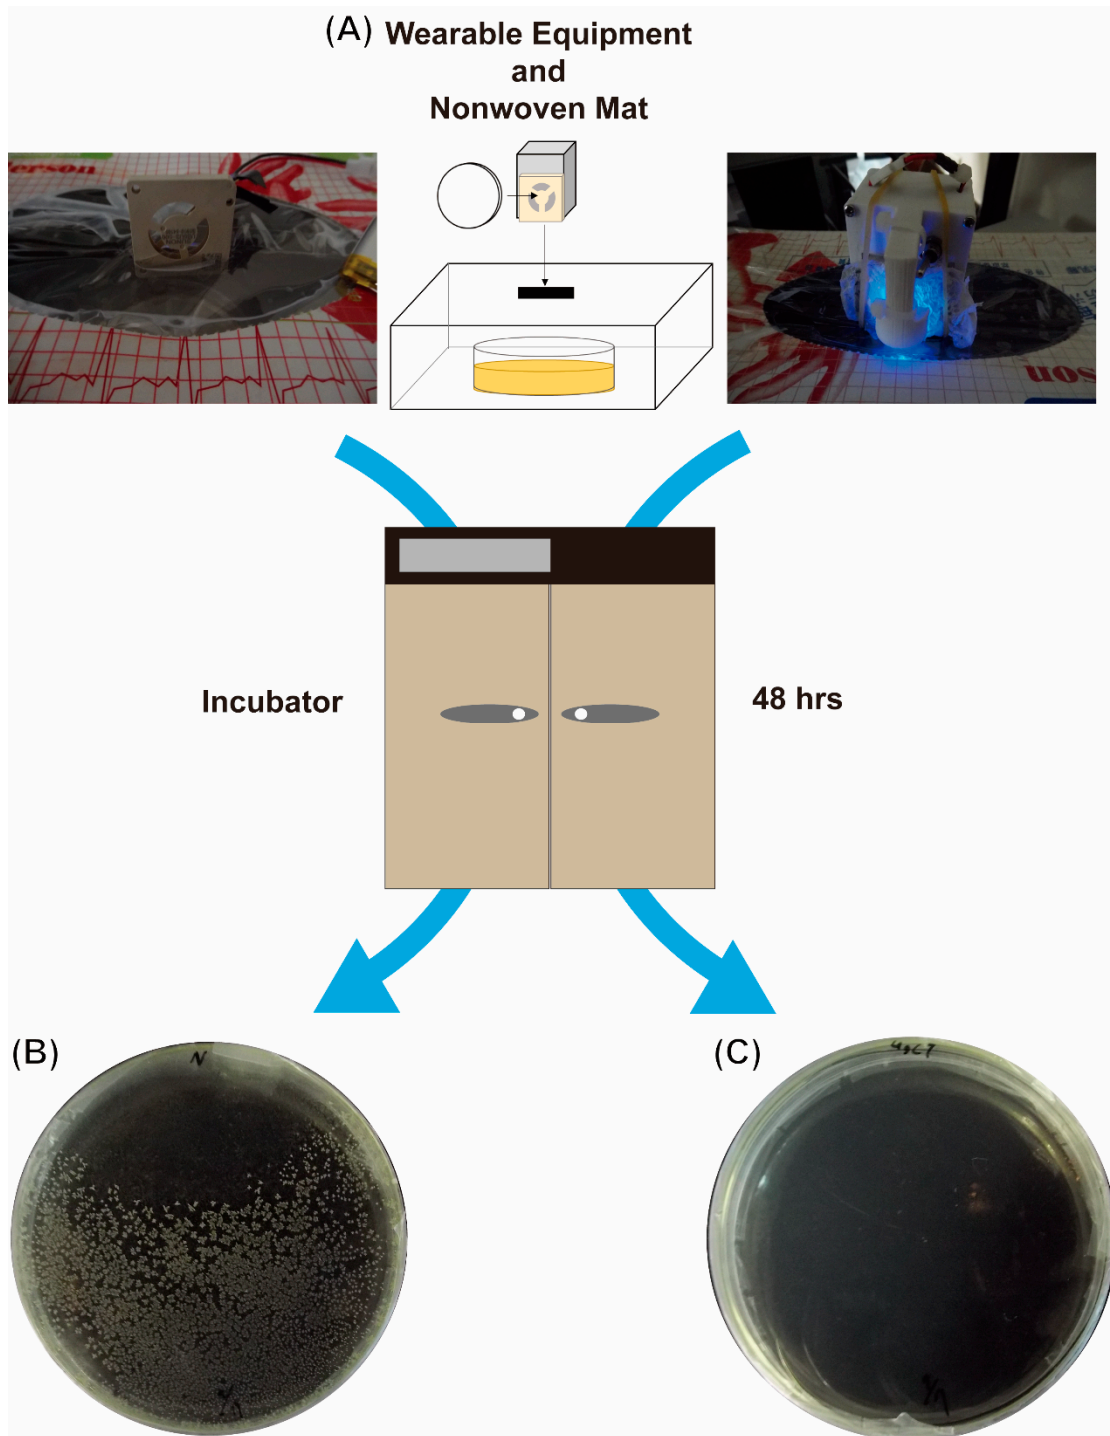

**Schematic Diagram S3.** Experimental steps of the pollutant filtrate. (A) The combination of the wearable equipment and nonwoven mat, (B) The control plate, (C) The filter plate

**Table.S1** The porosity of nonwoven mat (fG : fish Gelatin, g : gallic acid, lp : liquid paraffin)

| Sample | Count | Total Area<br>( $\mu\text{m}^2$ ) | Average<br>( $\mu\text{m}^2$ ) | Standard<br>Deviation | Porosity<br>(%) |
|--------|-------|-----------------------------------|--------------------------------|-----------------------|-----------------|
| fG     | 972   | 259.69                            | 0.27                           | 0.40                  | 14.84           |
| fGg    | 1244  | 548.39                            | 0.44                           | 0.61                  | 31.59           |
| fGlp   | 965   | 193.48                            | 0.20                           | 0.38                  | 7.51            |
| fGgIp  | 908   | 202.843                           | 0.223                          | 0.33547               | 11.566          |

**Table.S2** The porosity of nonwoven mat (fG : fish Gelatin, g : gallic acid, T : Tween

| Sample | Count | Total Area<br>( $\mu\text{m}^2$ ) | Average<br>( $\mu\text{m}^2$ ) | Standard<br>Deviation | Porosity<br>(%) |
|--------|-------|-----------------------------------|--------------------------------|-----------------------|-----------------|
| fG     | 622   | 36.31                             | 0.06                           | 0.08                  | 18.32           |
| fGg    | 976   | 40.68                             | 0.04                           | 0.04                  | 20.58           |
| fGT    | 308   | 10.83                             | 0.03                           | 0.03                  | 5.49            |
| fGgT   | 379   | 19.89                             | 0.05                           | 0.06                  | 10.08           |

**Table.S3** The integral area and absorbed dose of experimental groups.

|                        |                                   | fGglp    | F-fGglp  | UV-<br>F-fGglp | fGgT    | F-fGgT  | UV-<br>F-fGgT |
|------------------------|-----------------------------------|----------|----------|----------------|---------|---------|---------------|
| <b>Gallic acid</b>     | Leaching dose (mg)                | 1.97     | 1.87     | 1.90           | 1.90    | 2.02    | 2.19          |
|                        |                                   | ±        | ±        | ±              | ±       | ±       | ±             |
|                        |                                   | 1.02     | 0.27     | 0.10           | 0.94    | 0.64    | 1.09          |
| <b>Nicotine</b>        | Adsorbed dose (μg)                |          | 152.25   | 180.10         |         | 101.15  | 162.91        |
|                        |                                   | none     | ±        | ±              | none    | ±       | ±             |
|                        |                                   |          | 6.59     | 16.08          |         | 16.15   | 17.23         |
| <b>Liquid paraffin</b> | Integral area (mAU <sup>2</sup> ) | 257146   | 333085   | 345082         |         |         |               |
|                        |                                   | ±        | ±        | ±              |         |         |               |
|                        |                                   | 17824.99 | 11895.65 | 10468.82       |         |         |               |
| <b>Tween 80</b>        | Integral area (mAU <sup>2</sup> ) |          |          |                | 107896  | 163457  | 190243        |
|                        |                                   |          |          |                | ±       | ±       | ±             |
|                        |                                   |          |          |                | 4804.36 | 3729.37 | 8427.22       |

**Table.S4** The intensity of nicotine derivatives in Figures 9C–F (fG : fish Gelatin, g : gallic acid, lp : liquid paraffin, F : fumigated, UV : 365 nm)

|                                                       | <b>F-fGlp</b> | <b>F-fGglp</b> | <b>UV-F-fGlp</b> | <b>UV-F-fGglp</b> |
|-------------------------------------------------------|---------------|----------------|------------------|-------------------|
| <b>Nicotine</b><br><b>(m/z = 163)</b>                 | 60.49         | 293.26         | 78.12            | 733.10            |
| <b>Nornicotine</b><br><b>(m/z = 149)</b>              | 30.19         | 93.03          | 47.02            | 65.87             |
| <b>Nicotine-N-Oxide</b><br><b>(m/z = 179)</b>         | 25.22         | 61.80          | none             | 34.90             |
| <b>Cotinine</b><br><b>(m/z = 177)</b>                 | 35.20         | 203.64         | 68.45            | 189               |
| <b>Trans-3'-Hydroxycotinine</b><br><b>(m/z = 193)</b> | none          | 138.63         | 138.80           | 190.48            |

**Table.S5** The intensity of nicotine derivatives in Figures 10C–F (fG : fish Gelatin, g : gallic acid, T : Tween 80, F : fumigated, UV : 365 nm)

|                                                       | <b>F-fGT</b> | <b>F-fGgT</b> | <b>UV-F-fGT</b> | <b>UV-F-fGgT</b> |
|-------------------------------------------------------|--------------|---------------|-----------------|------------------|
| <b>Nicotine</b><br><b>(m/z = 163)</b>                 | 3826.03      | 4648.52       | 4602.83         | 8860.32          |
| <b>Nornicotine</b><br><b>(m/z = 149)</b>              | 1027         | none          | 1006.08         | 174.94           |
| <b>Nicotine-N-Oxide</b><br><b>(m/z = 179)</b>         | 663.85       | 1424.49       | 1243.65         | 1161.72          |
| <b>Cotinine</b><br><b>(m/z = 177)</b>                 | none         | none          | none            | none             |
| <b>Trans-3'-Hydroxycotinine</b><br><b>(m/z = 193)</b> | 274.38       | none          | 552.82          | none             |
